# Supplementary material
Source: publisher figshare collection journal article supplement (https://acs.figshare.com/ndownloader/files/4396321)
Supplement: Supplementary file 1 [file 4396321]

 
data_GDS_23 
  
_audit_creation_method            SHELXL-97 
_chemical_name_systematic 
; 
 ? 
; 
_chemical_name_common             ? 
_chemical_melting_point           ? 
_chemical_formula_moiety          ? 
_chemical_formula_sum 
 'C30 H36 N6 O8 S2' 
_chemical_formula_weight          672.77 
  
loop_ 
 _atom_type_symbol 
 _atom_type_description 
 _atom_type_scat_dispersion_real 
 _atom_type_scat_dispersion_imag 
 _atom_type_scat_source 
 'C'  'C'   0.0033   0.0016 
 'International Tables Vol C Tables 4.2.6.8 and 6.1.1.4' 
 'H'  'H'   0.0000   0.0000 
 'International Tables Vol C Tables 4.2.6.8 and 6.1.1.4' 
 'N'  'N'   0.0061   0.0033 
 'International Tables Vol C Tables 4.2.6.8 and 6.1.1.4' 
 'O'  'O'   0.0106   0.0060 
 'International Tables Vol C Tables 4.2.6.8 and 6.1.1.4' 
 'S'  'S'   0.1246   0.1234 
 'International Tables Vol C Tables 4.2.6.8 and 6.1.1.4' 
  
_symmetry_cell_setting            Triclinic 
_symmetry_space_group_name_H-M    P-1 
  
loop_ 
 _symmetry_equiv_pos_as_xyz 
 'x, y, z' 
 '-x, -y, -z' 
  
_cell_length_a                    6.0960(4) 
_cell_length_b                    7.2875(4) 
_cell_length_c                    18.3630(11) 
_cell_angle_alpha                 97.1930(10) 
_cell_angle_beta                  98.1780(10) 
_cell_angle_gamma                 92.0110(10) 
_cell_volume                      799.96(8) 
_cell_formula_units_Z             1 
_cell_measurement_temperature     200(2) 
_cell_measurement_reflns_used     5102 
_cell_measurement_theta_min       2.26 
_cell_measurement_theta_max       26.64 
  
_exptl_crystal_description        plate 
_exptl_crystal_colour             colourless 
_exptl_crystal_size_max           0.18 
_exptl_crystal_size_mid           0.08 
_exptl_crystal_size_min           0.03 
_exptl_crystal_density_meas       ? 
_exptl_crystal_density_diffrn     1.397 
_exptl_crystal_density_method     'not measured' 
_exptl_crystal_F_000              354 
_exptl_absorpt_coefficient_mu     0.226 
_exptl_absorpt_correction_type    multi-scan 
_exptl_absorpt_correction_T_min   0.9604 
_exptl_absorpt_correction_T_max   0.9932 
_exptl_absorpt_process_details    sadabs 
  
_exptl_special_details 
; 
 ? 
; 
  
_diffrn_ambient_temperature       200(2) 
_diffrn_radiation_wavelength      0.71073 
_diffrn_radiation_type            MoK\a 
_diffrn_radiation_source          'fine-focus sealed tube' 
_diffrn_radiation_monochromator   graphite 
_diffrn_measurement_device_type   'Bruker APEX-II CCD' 
_diffrn_measurement_method        '\f and \w scans' 
_diffrn_detector_area_resol_mean  ? 
_diffrn_reflns_number             14718 
_diffrn_reflns_av_R_equivalents   0.0289 
_diffrn_reflns_av_sigmaI/netI     0.0256 
_diffrn_reflns_limit_h_min        -7 
_diffrn_reflns_limit_h_max        7 
_diffrn_reflns_limit_k_min        -9 
_diffrn_reflns_limit_k_max        9 
_diffrn_reflns_limit_l_min        -23 
_diffrn_reflns_limit_l_max        23 
_diffrn_reflns_theta_min          2.26 
_diffrn_reflns_theta_max          26.73 
_reflns_number_total              3389 
_reflns_number_gt                 2811 
_reflns_threshold_expression      >2sigma(I) 
  
_computing_data_collection        'Bruker APEX2' 
_computing_cell_refinement        'Bruker SAINT' 
_computing_data_reduction         'Bruker SAINT' 
_computing_structure_solution     'SHELXS-97 (Sheldrick, 2008)' 
_computing_structure_refinement   'SHELXL-97 (Sheldrick, 2008)' 
_computing_molecular_graphics     'Bruker SHELXTL' 
_computing_publication_material   'Bruker SHELXTL' 
  
_refine_special_details 
; 
 Refinement of F^2^ against ALL reflections.  The weighted R-factor wR and 
 goodness of fit S are based on F^2^, conventional R-factors R are based 
 on F, with F set to zero for negative F^2^. The threshold expression of 
 F^2^ > 2sigma(F^2^) is used only for calculating R-factors(gt) etc. and is 
 not relevant to the choice of reflections for refinement.  R-factors based 
 on F^2^ are statistically about twice as large as those based on F, and R- 
 factors based on ALL data will be even larger. 
; 
  
_refine_ls_structure_factor_coef  Fsqd 
_refine_ls_matrix_type            full 
_refine_ls_weighting_scheme       calc 
_refine_ls_weighting_details 
 'calc w=1/[\s^2^(Fo^2^)+(0.0459P)^2^+0.2630P] where P=(Fo^2^+2Fc^2^)/3' 
_atom_sites_solution_primary      direct 
_atom_sites_solution_secondary    difmap 
_atom_sites_solution_hydrogens    geom 
_refine_ls_hydrogen_treatment     constr 
_refine_ls_extinction_method      none 
_refine_ls_extinction_coef        ? 
_refine_ls_number_reflns          3389 
_refine_ls_number_parameters      272 
_refine_ls_number_restraints      204 
_refine_ls_R_factor_all           0.0446 
_refine_ls_R_factor_gt            0.0333 
_refine_ls_wR_factor_ref          0.0907 
_refine_ls_wR_factor_gt           0.0842 
_refine_ls_goodness_of_fit_ref    1.038 
_refine_ls_restrained_S_all       1.008 
_refine_ls_shift/su_max           0.001 
_refine_ls_shift/su_mean          0.000 
  
loop_ 
 _atom_site_label 
 _atom_site_type_symbol 
 _atom_site_fract_x 
 _atom_site_fract_y 
 _atom_site_fract_z 
 _atom_site_U_iso_or_equiv 
 _atom_site_adp_type 
 _atom_site_occupancy 
 _atom_site_symmetry_multiplicity 
 _atom_site_calc_flag 
 _atom_site_refinement_flags 
 _atom_site_disorder_assembly 
 _atom_site_disorder_group 
C1 C 0.4396(2) 0.2404(2) 0.42552(8) 0.0225(3) Uani 1 1 d . . . 
C2 C 0.8206(2) 0.6517(2) 0.29610(8) 0.0213(3) Uani 1 1 d . . . 
C3 C 1.0125(3) 0.6936(2) 0.26773(8) 0.0265(3) Uani 1 1 d . . . 
H3 H 1.1321 0.7640 0.2988 0.032 Uiso 1 1 calc R . . 
C4 C 1.0312(3) 0.6335(2) 0.19407(9) 0.0281(3) Uani 1 1 d . . . 
H4 H 1.1631 0.6619 0.1748 0.034 Uiso 1 1 calc R . . 
C5 C 0.8546(3) 0.5314(2) 0.14898(8) 0.0259(3) Uani 1 1 d . . . 
C6 C 0.6652(3) 0.4844(2) 0.17814(9) 0.0303(4) Uani 1 1 d . . . 
H6 H 0.5473 0.4106 0.1476 0.036 Uiso 1 1 calc R . . 
C7 C 0.6480(3) 0.5447(2) 0.25145(9) 0.0275(3) Uani 1 1 d . . . 
H7 H 0.5181 0.5129 0.2712 0.033 Uiso 1 1 calc R . . 
C8 C 1.0363(3) 0.5224(2) 0.04127(8) 0.0308(4) Uani 1 1 d . . . 
H8A H 1.1656 0.4511 0.0574 0.037 Uiso 1 1 calc R . . 
H8B H 1.0776 0.6562 0.0549 0.037 Uiso 1 1 calc R . . 
N1 N 0.3427(2) 0.07510(18) 0.42579(7) 0.0285(3) Uani 1 1 d . . . 
H1A H 0.4225 -0.0232 0.4259 0.034 Uiso 1 1 calc R . . 
H1B H 0.1986 0.0635 0.4258 0.034 Uiso 1 1 calc R . . 
N2 N 0.6560(2) 0.25603(19) 0.42545(8) 0.0319(3) Uani 1 1 d . . . 
H2A H 0.7346 0.1570 0.4256 0.038 Uiso 1 1 calc R . . 
H2B H 0.7216 0.3654 0.4253 0.038 Uiso 1 1 calc R . . 
N3 N 0.3218(2) 0.39020(18) 0.42330(7) 0.0284(3) Uani 1 1 d . . . 
H3A H 0.3881 0.4986 0.4218 0.034 Uiso 1 1 calc R . . 
H3B H 0.1775 0.3810 0.4233 0.034 Uiso 1 1 calc R . . 
O1 O 0.92147(18) 0.61294(15) 0.43565(6) 0.0285(3) Uani 1 1 d . . . 
O2 O 0.89169(17) 0.92418(14) 0.40285(6) 0.0280(3) Uani 1 1 d . . . 
O3 O 0.56112(17) 0.72403(14) 0.39488(6) 0.0254(2) Uani 1 1 d . . . 
O4 O 0.8497(2) 0.47151(16) 0.07502(6) 0.0337(3) Uani 1 1 d . . . 
S1 S 0.79784(6) 0.73411(5) 0.389469(19) 0.01986(11) Uani 1 1 d . . . 
C9 C 0.463(3) 0.059(3) 0.2308(10) 0.038(3) Uani 0.573(10) 1 d PU A 1 
H9 H 0.5474 0.0718 0.2790 0.046 Uiso 0.573(10) 1 calc PR A 1 
C10 C 0.552(4) -0.036(4) 0.1700(11) 0.039(3) Uani 0.573(10) 1 d PU A 1 
H10 H 0.6951 -0.0838 0.1787 0.047 Uiso 0.573(10) 1 calc PR A 1 
C11 C 0.436(2) -0.060(2) 0.0981(8) 0.036(2) Uani 0.573(10) 1 d PU A 1 
H11 H 0.4975 -0.1255 0.0582 0.043 Uiso 0.573(10) 1 calc PR A 1 
C12 C 0.2281(15) 0.0136(12) 0.0864(6) 0.0249(15) Uani 0.573(10) 1 d PU A 1 
C13 C 0.145(2) 0.108(2) 0.1467(7) 0.034(2) Uani 0.573(10) 1 d PU A 1 
H13 H 0.0049 0.1597 0.1375 0.041 Uiso 0.573(10) 1 calc PR A 1 
C14 C 0.257(3) 0.131(3) 0.2211(13) 0.042(3) Uani 0.573(10) 1 d PU A 1 
H14 H 0.1944 0.1929 0.2613 0.050 Uiso 0.573(10) 1 calc PR A 1 
C15 C 0.1043(8) -0.0173(5) 0.0102(3) 0.0361(14) Uani 0.573(10) 1 d PU . 1 
H15 H 0.1836 -0.0673 -0.0279 0.043 Uiso 0.573(10) 1 calc PR A 1 
C9' C 0.504(4) 0.035(4) 0.2203(12) 0.035(4) Uani 0.427(10) 1 d PU A 2 
H9' H 0.6090 0.0315 0.2635 0.042 Uiso 0.427(10) 1 calc PR A 2 
C10' C 0.543(6) -0.044(5) 0.1541(15) 0.045(5) Uani 0.427(10) 1 d PU A 2 
H10' H 0.6775 -0.1018 0.1483 0.054 Uiso 0.427(10) 1 calc PR A 2 
C11' C 0.378(3) -0.037(3) 0.0940(9) 0.031(3) Uani 0.427(10) 1 d PU A 2 
H11' H 0.4054 -0.0901 0.0464 0.037 Uiso 0.427(10) 1 calc PR A 2 
C12' C 0.174(2) 0.0435(17) 0.0988(7) 0.025(2) Uani 0.427(10) 1 d PU A 2 
C13' C 0.141(4) 0.125(3) 0.1674(8) 0.036(3) Uani 0.427(10) 1 d PU A 2 
H13' H 0.0073 0.1826 0.1748 0.043 Uiso 0.427(10) 1 calc PR A 2 
C14' C 0.310(4) 0.120(4) 0.2246(15) 0.038(4) Uani 0.427(10) 1 d PU A 2 
H14' H 0.2894 0.1809 0.2718 0.046 Uiso 0.427(10) 1 calc PR A 2 
C15' C 0.0009(9) 0.0410(6) 0.0352(3) 0.0273(17) Uani 0.427(10) 1 d PU . 2 
H15' H -0.1274 0.1053 0.0444 0.033 Uiso 0.427(10) 1 calc PRU A 2 
  
loop_ 
 _atom_site_aniso_label 
 _atom_site_aniso_U_11 
 _atom_site_aniso_U_22 
 _atom_site_aniso_U_33 
 _atom_site_aniso_U_23 
 _atom_site_aniso_U_13 
 _atom_site_aniso_U_12 
C1 0.0223(7) 0.0252(8) 0.0195(7) 0.0006(6) 0.0032(6) 0.0013(6) 
C2 0.0247(8) 0.0201(7) 0.0192(7) 0.0016(5) 0.0044(6) 0.0023(6) 
C3 0.0250(8) 0.0300(8) 0.0237(8) 0.0010(6) 0.0042(6) -0.0022(6) 
C4 0.0275(8) 0.0328(9) 0.0251(8) 0.0022(6) 0.0089(6) -0.0006(7) 
C5 0.0334(9) 0.0244(8) 0.0200(7) 0.0009(6) 0.0059(6) 0.0019(6) 
C6 0.0306(9) 0.0314(9) 0.0262(8) -0.0013(7) 0.0014(7) -0.0067(7) 
C7 0.0268(8) 0.0285(8) 0.0273(8) 0.0016(6) 0.0074(6) -0.0034(6) 
C8 0.0381(9) 0.0316(9) 0.0230(8) 0.0007(7) 0.0090(7) -0.0031(7) 
N1 0.0217(7) 0.0251(7) 0.0384(8) 0.0006(6) 0.0062(6) 0.0012(5) 
N2 0.0214(7) 0.0233(7) 0.0509(9) 0.0013(6) 0.0080(6) 0.0015(5) 
N3 0.0227(7) 0.0246(7) 0.0389(8) 0.0032(6) 0.0075(6) 0.0041(5) 
O1 0.0285(6) 0.0335(6) 0.0249(6) 0.0073(5) 0.0045(4) 0.0082(5) 
O2 0.0258(6) 0.0229(6) 0.0340(6) -0.0044(4) 0.0086(5) -0.0028(4) 
O3 0.0202(5) 0.0274(6) 0.0291(6) 0.0009(4) 0.0081(4) 0.0014(4) 
O4 0.0402(7) 0.0382(7) 0.0213(6) -0.0028(5) 0.0085(5) -0.0081(5) 
S1 0.01922(19) 0.02023(19) 0.02030(18) 0.00096(13) 0.00487(13) 0.00156(13) 
C9 0.054(8) 0.034(5) 0.022(3) 0.000(3) -0.002(4) -0.007(5) 
C10 0.035(4) 0.036(6) 0.046(7) 0.016(5) 0.001(4) 0.000(3) 
C11 0.033(5) 0.026(3) 0.050(3) 0.007(2) 0.011(3) 0.004(3) 
C12 0.029(5) 0.019(3) 0.026(3) 0.002(2) 0.006(3) 0.001(3) 
C13 0.031(2) 0.030(4) 0.043(7) 0.005(5) 0.003(4) 0.002(2) 
C14 0.043(7) 0.032(4) 0.050(4) 0.001(3) 0.011(4) 0.000(4) 
C15 0.041(3) 0.0302(18) 0.037(3) 0.0045(15) 0.005(2) -0.0001(16) 
C9' 0.037(6) 0.032(6) 0.033(9) 0.009(6) -0.009(5) 0.006(4) 
C10' 0.043(6) 0.033(5) 0.055(11) 0.004(7) -0.002(7) 0.000(4) 
C11' 0.035(8) 0.029(5) 0.028(3) 0.003(3) 0.007(5) 0.008(5) 
C12' 0.029(5) 0.023(4) 0.024(5) 0.000(3) 0.004(3) 0.008(3) 
C13' 0.051(4) 0.026(4) 0.031(7) 0.001(5) 0.007(5) 0.000(3) 
C14' 0.047(10) 0.033(4) 0.035(4) 0.003(3) 0.010(6) 0.005(7) 
C15' 0.025(3) 0.028(2) 0.027(3) 0.0014(19) 0.000(2) 0.0020(18) 
  
_geom_special_details 
; 
 All esds (except the esd in the dihedral angle between two l.s. planes) 
 are estimated using the full covariance matrix.  The cell esds are taken 
 into account individually in the estimation of esds in distances, angles 
 and torsion angles; correlations between esds in cell parameters are only 
 used when they are defined by crystal symmetry.  An approximate (isotropic) 
 treatment of cell esds is used for estimating esds involving l.s. planes. 
; 
  
loop_ 
 _geom_bond_atom_site_label_1 
 _geom_bond_atom_site_label_2 
 _geom_bond_distance 
 _geom_bond_site_symmetry_2 
 _geom_bond_publ_flag 
C1 N2 1.3203(19) . ? 
C1 N1 1.3237(19) . ? 
C1 N3 1.3293(19) . ? 
C2 C3 1.386(2) . ? 
C2 C7 1.387(2) . ? 
C2 S1 1.7706(14) . ? 
C3 C4 1.391(2) . ? 
C3 H3 0.9500 . ? 
C4 C5 1.391(2) . ? 
C4 H4 0.9500 . ? 
C5 O4 1.3693(18) . ? 
C5 C6 1.389(2) . ? 
C6 C7 1.383(2) . ? 
C6 H6 0.9500 . ? 
C7 H7 0.9500 . ? 
C8 O4 1.4298(19) . ? 
C8 C8 1.508(3) 2_765 ? 
C8 H8A 0.9900 . ? 
C8 H8B 0.9900 . ? 
N1 H1A 0.8800 . ? 
N1 H1B 0.8800 . ? 
N2 H2A 0.8800 . ? 
N2 H2B 0.8800 . ? 
N3 H3A 0.8800 . ? 
N3 H3B 0.8800 . ? 
O1 S1 1.4558(11) . ? 
O2 S1 1.4579(11) . ? 
O3 S1 1.4604(10) . ? 
C9 C14 1.375(19) . ? 
C9 C10 1.42(3) . ? 
C9 H9 0.9500 . ? 
C10 C11 1.39(2) . ? 
C10 H10 0.9500 . ? 
C11 C12 1.397(9) . ? 
C11 H11 0.9500 . ? 
C12 C13 1.394(10) . ? 
C12 C15 1.478(12) . ? 
C13 C14 1.43(3) . ? 
C13 H13 0.9500 . ? 
C14 H14 0.9500 . ? 
C15 C15 1.316(10) 2 ? 
C15 H15 0.9500 . ? 
C9' C10' 1.33(3) . ? 
C9' C14' 1.36(2) . ? 
C9' H9' 0.9500 . ? 
C10' C11' 1.39(3) . ? 
C10' H10' 0.9500 . ? 
C11' C12' 1.401(11) . ? 
C11' H11' 0.9500 . ? 
C12' C13' 1.367(13) . ? 
C12' C15' 1.458(16) . ? 
C13' C14' 1.37(3) . ? 
C13' H13' 0.9500 . ? 
C14' H14' 0.9500 . ? 
C15' C15' 1.353(12) 2 ? 
C15' H15' 0.9500 . ? 
  
loop_ 
 _geom_angle_atom_site_label_1 
 _geom_angle_atom_site_label_2 
 _geom_angle_atom_site_label_3 
 _geom_angle 
 _geom_angle_site_symmetry_1 
 _geom_angle_site_symmetry_3 
 _geom_angle_publ_flag 
N2 C1 N1 119.45(14) . . ? 
N2 C1 N3 119.43(14) . . ? 
N1 C1 N3 121.09(14) . . ? 
C3 C2 C7 119.94(14) . . ? 
C3 C2 S1 119.72(11) . . ? 
C7 C2 S1 120.34(11) . . ? 
C2 C3 C4 120.48(14) . . ? 
C2 C3 H3 119.8 . . ? 
C4 C3 H3 119.8 . . ? 
C3 C4 C5 119.22(14) . . ? 
C3 C4 H4 120.4 . . ? 
C5 C4 H4 120.4 . . ? 
O4 C5 C6 115.24(14) . . ? 
O4 C5 C4 124.57(14) . . ? 
C6 C5 C4 120.19(14) . . ? 
C7 C6 C5 120.18(15) . . ? 
C7 C6 H6 119.9 . . ? 
C5 C6 H6 119.9 . . ? 
C6 C7 C2 119.93(14) . . ? 
C6 C7 H7 120.0 . . ? 
C2 C7 H7 120.0 . . ? 
O4 C8 C8 105.74(16) . 2_765 ? 
O4 C8 H8A 110.6 . . ? 
C8 C8 H8A 110.6 2_765 . ? 
O4 C8 H8B 110.6 . . ? 
C8 C8 H8B 110.6 2_765 . ? 
H8A C8 H8B 108.7 . . ? 
C1 N1 H1A 120.0 . . ? 
C1 N1 H1B 120.0 . . ? 
H1A N1 H1B 120.0 . . ? 
C1 N2 H2A 120.0 . . ? 
C1 N2 H2B 120.0 . . ? 
H2A N2 H2B 120.0 . . ? 
C1 N3 H3A 120.0 . . ? 
C1 N3 H3B 120.0 . . ? 
H3A N3 H3B 120.0 . . ? 
C5 O4 C8 117.69(12) . . ? 
O1 S1 O2 112.66(7) . . ? 
O1 S1 O3 112.07(6) . . ? 
O2 S1 O3 112.18(6) . . ? 
O1 S1 C2 107.10(7) . . ? 
O2 S1 C2 106.15(7) . . ? 
O3 S1 C2 106.13(7) . . ? 
C14 C9 C10 121(2) . . ? 
C14 C9 H9 119.4 . . ? 
C10 C9 H9 119.4 . . ? 
C11 C10 C9 122(2) . . ? 
C11 C10 H10 118.9 . . ? 
C9 C10 H10 118.9 . . ? 
C10 C11 C12 118.0(16) . . ? 
C10 C11 H11 121.0 . . ? 
C12 C11 H11 121.0 . . ? 
C13 C12 C11 118.9(12) . . ? 
C13 C12 C15 123.5(8) . . ? 
C11 C12 C15 117.5(9) . . ? 
C12 C13 C14 124.4(13) . . ? 
C12 C13 H13 117.8 . . ? 
C14 C13 H13 117.8 . . ? 
C9 C14 C13 115.3(18) . . ? 
C9 C14 H14 122.3 . . ? 
C13 C14 H14 122.3 . . ? 
C15 C15 C12 126.8(6) 2 . ? 
C15 C15 H15 116.6 2 . ? 
C12 C15 H15 116.6 . . ? 
C10' C9' C14' 119(3) . . ? 
C10' C9' H9' 120.7 . . ? 
C14' C9' H9' 120.7 . . ? 
C9' C10' C11' 117(3) . . ? 
C9' C10' H10' 121.4 . . ? 
C11' C10' H10' 121.4 . . ? 
C10' C11' C12' 124(2) . . ? 
C10' C11' H11' 117.8 . . ? 
C12' C11' H11' 117.8 . . ? 
C13' C12' C11' 116.9(16) . . ? 
C13' C12' C15' 120.1(12) . . ? 
C11' C12' C15' 123.0(10) . . ? 
C14' C13' C12' 116.9(19) . . ? 
C14' C13' H13' 121.6 . . ? 
C12' C13' H13' 121.6 . . ? 
C9' C14' C13' 126(2) . . ? 
C9' C14' H14' 117.0 . . ? 
C13' C14' H14' 117.0 . . ? 
C15' C15' C12' 128.4(7) 2 . ? 
C15' C15' H15' 115.8 2 . ? 
C12' C15' H15' 115.8 . . ? 
  
loop_ 
 _geom_torsion_atom_site_label_1 
 _geom_torsion_atom_site_label_2 
 _geom_torsion_atom_site_label_3 
 _geom_torsion_atom_site_label_4 
 _geom_torsion 
 _geom_torsion_site_symmetry_1 
 _geom_torsion_site_symmetry_2 
 _geom_torsion_site_symmetry_3 
 _geom_torsion_site_symmetry_4 
 _geom_torsion_publ_flag 
C7 C2 C3 C4 1.8(2) . . . . ? 
S1 C2 C3 C4 -178.58(12) . . . . ? 
C2 C3 C4 C5 0.3(2) . . . . ? 
C3 C4 C5 O4 177.07(14) . . . . ? 
C3 C4 C5 C6 -2.4(2) . . . . ? 
O4 C5 C6 C7 -177.10(14) . . . . ? 
C4 C5 C6 C7 2.4(2) . . . . ? 
C5 C6 C7 C2 -0.3(2) . . . . ? 
C3 C2 C7 C6 -1.8(2) . . . . ? 
S1 C2 C7 C6 178.59(12) . . . . ? 
C6 C5 O4 C8 177.45(14) . . . . ? 
C4 C5 O4 C8 -2.0(2) . . . . ? 
C8 C8 O4 C5 -167.25(16) 2_765 . . . ? 
C3 C2 S1 O1 -79.09(13) . . . . ? 
C7 C2 S1 O1 100.55(13) . . . . ? 
C3 C2 S1 O2 41.49(14) . . . . ? 
C7 C2 S1 O2 -138.87(13) . . . . ? 
C3 C2 S1 O3 161.03(12) . . . . ? 
C7 C2 S1 O3 -19.33(14) . . . . ? 
C14 C9 C10 C11 0(3) . . . . ? 
C9 C10 C11 C12 1(3) . . . . ? 
C10 C11 C12 C13 -0.1(19) . . . . ? 
C10 C11 C12 C15 -178.5(14) . . . . ? 
C11 C12 C13 C14 -1(2) . . . . ? 
C15 C12 C13 C14 176.9(15) . . . . ? 
C10 C9 C14 C13 -1(3) . . . . ? 
C12 C13 C14 C9 2(3) . . . . ? 
C13 C12 C15 C15 -8.7(11) . . . 2 ? 
C11 C12 C15 C15 169.7(8) . . . 2 ? 
C14' C9' C10' C11' -2(4) . . . . ? 
C9' C10' C11' C12' -1(4) . . . . ? 
C10' C11' C12' C13' 2(3) . . . . ? 
C10' C11' C12' C15' -177(2) . . . . ? 
C11' C12' C13' C14' 0(3) . . . . ? 
C15' C12' C13' C14' 179.1(19) . . . . ? 
C10' C9' C14' C13' 4(4) . . . . ? 
C12' C13' C14' C9' -3(4) . . . . ? 
C13' C12' C15' C15' -176.1(12) . . . 2 ? 
C11' C12' C15' C15' 3.2(16) . . . 2 ? 
  
loop_ 
 _geom_hbond_atom_site_label_D 
 _geom_hbond_atom_site_label_H 
 _geom_hbond_atom_site_label_A 
 _geom_hbond_distance_DH 
 _geom_hbond_distance_HA 
 _geom_hbond_distance_DA 
 _geom_hbond_angle_DHA 
 _geom_hbond_site_symmetry_A 
N1 H1A O3  0.88 2.10 2.9547(16) 163.2 1_545 
N1 H1B O2  0.88 2.06 2.8791(17) 154.4 1_445 
N2 H2A O2  0.88 2.01 2.8718(17) 167.9 1_545 
N2 H2B O1  0.88 2.11 2.9859(17) 170.9 . 
N3 H3A O3  0.88 2.07 2.9333(17) 166.6 . 
N3 H3B O1  0.88 2.35 2.9975(17) 130.3 1_455 
  
_diffrn_measured_fraction_theta_max    0.998 
_diffrn_reflns_theta_full              26.73 
_diffrn_measured_fraction_theta_full   0.998 
_refine_diff_density_max    0.458 
_refine_diff_density_min   -0.304 
_refine_diff_density_rms    0.043 
